# Supplementary material
Source: PubMed Central journal article supplement (PMC3589169)
Supplement: mt2012268x1.pdf [file mt2012268x1.pdf]

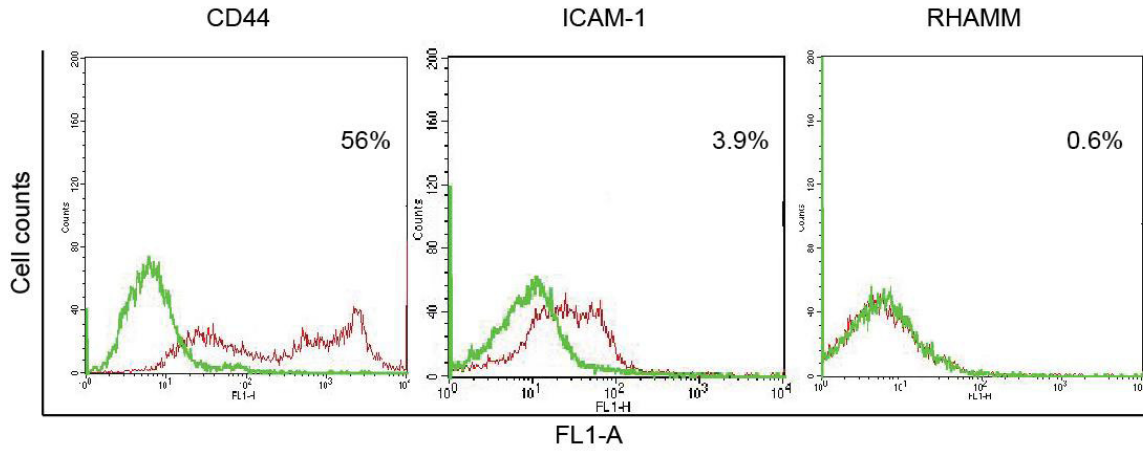

**Figure S1: Flow cytometric analysis of common HA receptors CD44, ICAM-1 and RHAMM.** Histograms indicate isotype control (green) and the expression level of each receptor in freshly isolated MNCs (red).
