# Supplementary material
Source: PubMed Central journal article supplement (PMC3589169)
Supplement: mt2012268x2.pdf [file mt2012268x2.pdf]

b

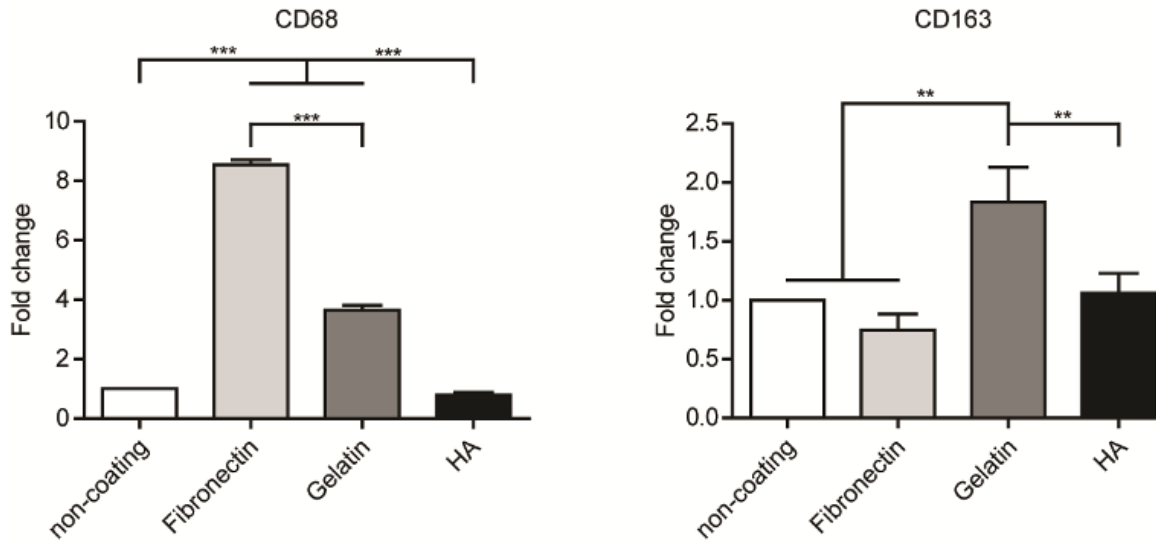

**Figure S2: HA enhances gene expression of progenitor cell but not monocyte/macrophage.** (a) Progenitor and (b) monocyte/macrophage gene expression in bone marrow mononuclear cells cultured on different coating materials were analyzed by real-time RT-PCR. Data are presented as mean  $\pm$  SEM. \*\*  $P < 0.01$ , \*\*\* $P < 0.001$ .  $n = 4$  per group.
