# Supplementary material
Source: PubMed Central journal article supplement (PMC3589169)
Supplement: mt2012268x4.pdf [file mt2012268x4.pdf]

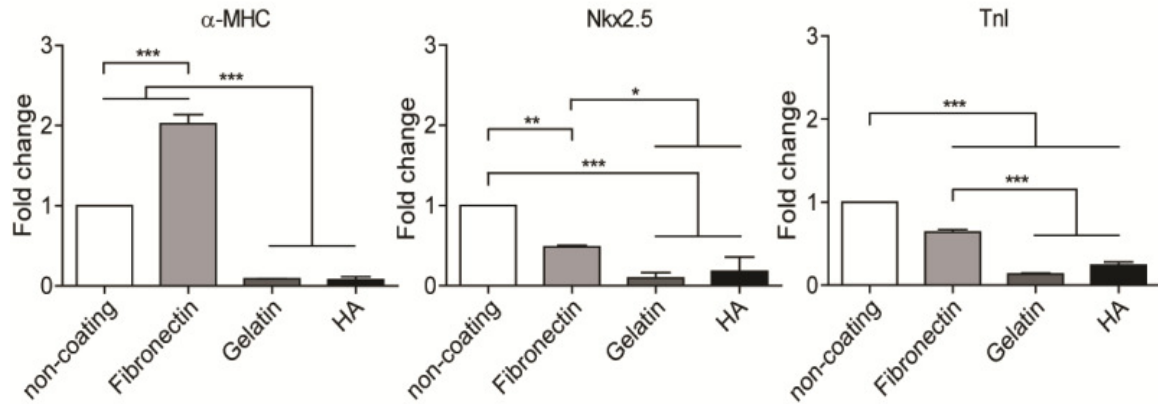

**Figure S4: HA does not induce cardiogenic gene expression of MNCs under hypoxic condition.** Cardiogenic gene expression of bone marrow mononuclear cells cultured on different coating materials under hypoxia were analyzed by real-time RT-PCR after 2 days. Data are presented as mean  $\pm$  SEM. \*  $P < 0.05$ , \*\*  $P < 0.01$ , \*\*\*  $P < 0.001$ .  $n = 4$  per group.
