# Supplementary material
Source: PubMed Central journal article supplement (PMC3589169)
Supplement: mt2012268x5.pdf [file mt2012268x5.pdf]

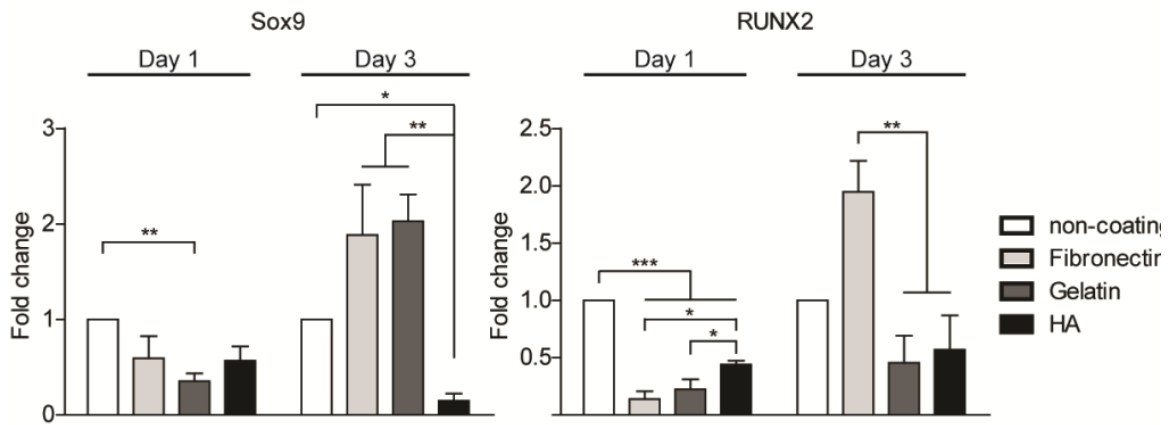

**Figure S5: HA reduces chondrogenesis-associated gene expression of MNCs.**

Chondrogenic gene expression of bone marrow mononuclear cells cultured on different coating materials was analyzed by real-time RT-PCR after 1 and 3 days. Data are presented as mean  $\pm$  SEM. \*  $P < 0.05$ , \*\*  $P < 0.01$ , \*\*\*  $P < 0.001$ .  $n = 4$  per group.
