# Supplementary material
Source: PubMed Central journal article supplement (PMC3589169)
Supplement: mt2012268x6.pdf [file mt2012268x6.pdf]

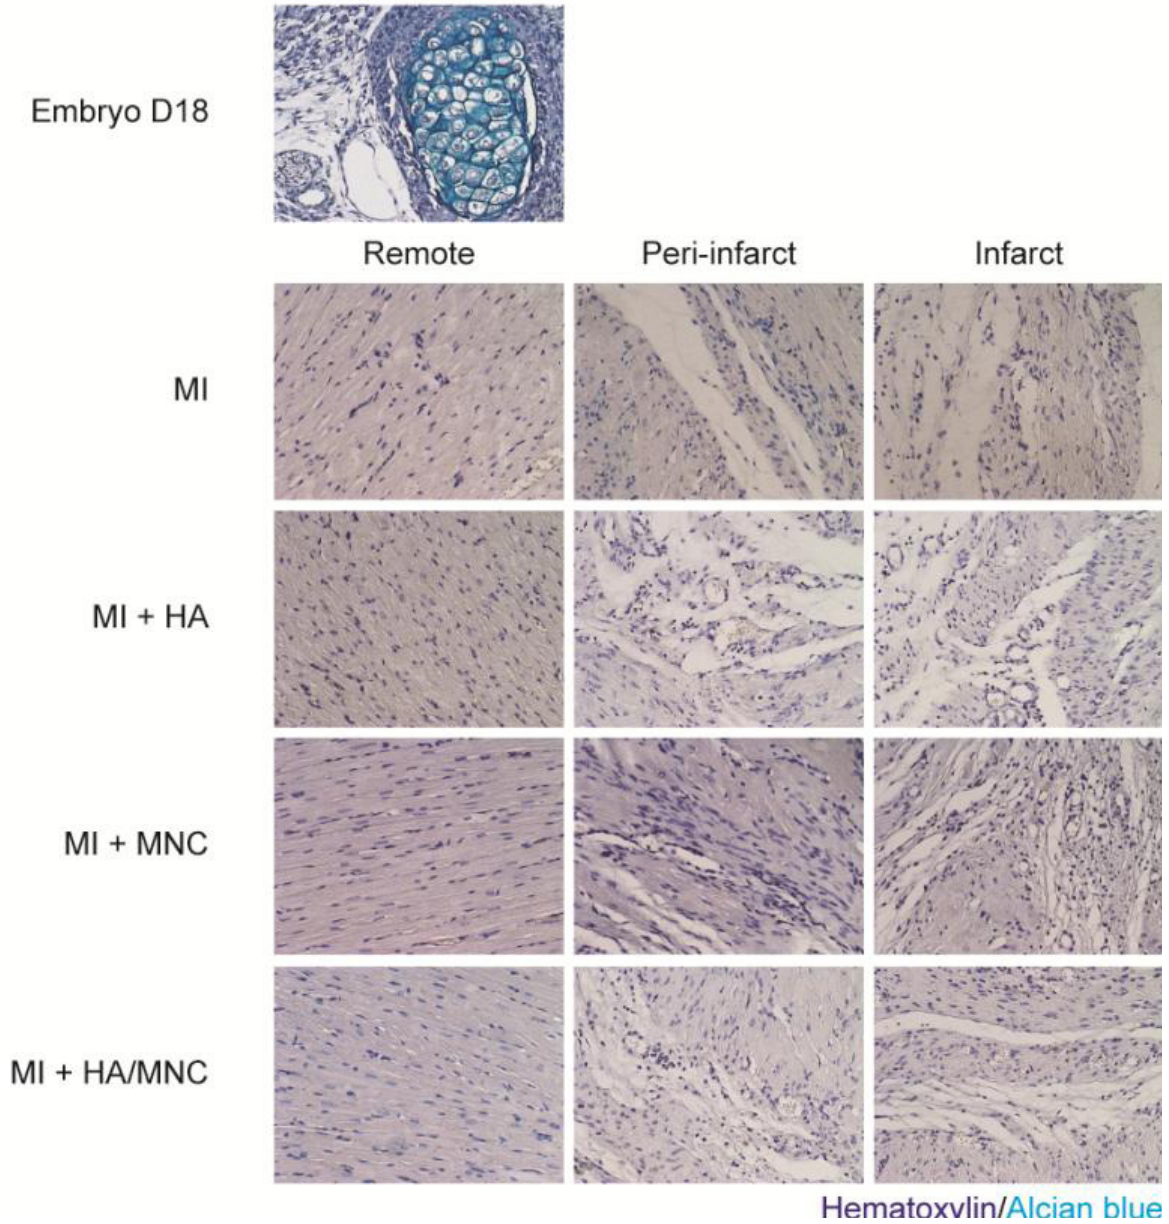

**Figure S6: Chondrogenesis is not observed in all treatment groups and the MI alone group.** Representative alcian blue staining images to examine chondrogenesis at the remote, peri-infarct and the infarct region from MI, MI + HA, MI + MNC, and MI + HA/MNC 28 days post-MI. An E18 rat embryo was used as positive control. Nuclei (purple), chondrocyte (light blue).
