# Supplementary material
Source: PubMed Central journal article supplement (PMC3589169)
Supplement: mt2012268x7.pdf [file mt2012268x7.pdf]

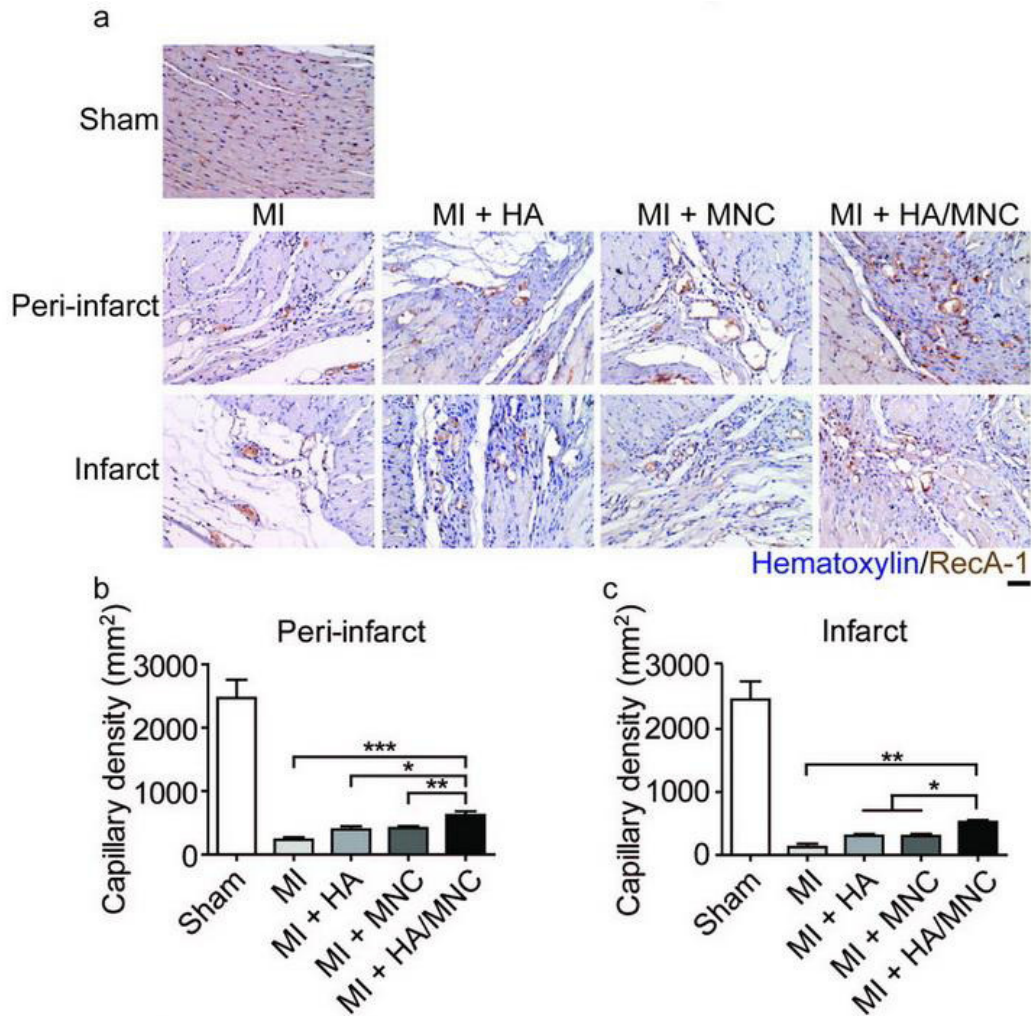

**Figure S7: HA/MNC injection increases capillary and arteriole densities post-MI.**

Representative immunostaining images of RECA-1 (brown) for endothelial cells at the peri-infarct and the infarct regions from each group. Nuclei are blue. Scale bar: 50  $\mu$ m for all panels. **(b-c)** The quantification of capillary density at the peri-infarct **(b)** and infarct **(c)** areas. The data are presented as the mean SEM. \*  $P < 0.05$ , \*\*  $P < 0.01$ , \*\*\*  $P < 0.001$ .  $n = 8$  per group.
