# Supplementary material
Source: PubMed Central journal article supplement (PMC3589169)
Supplement: mt2012268x8.pdf [file mt2012268x8.pdf]

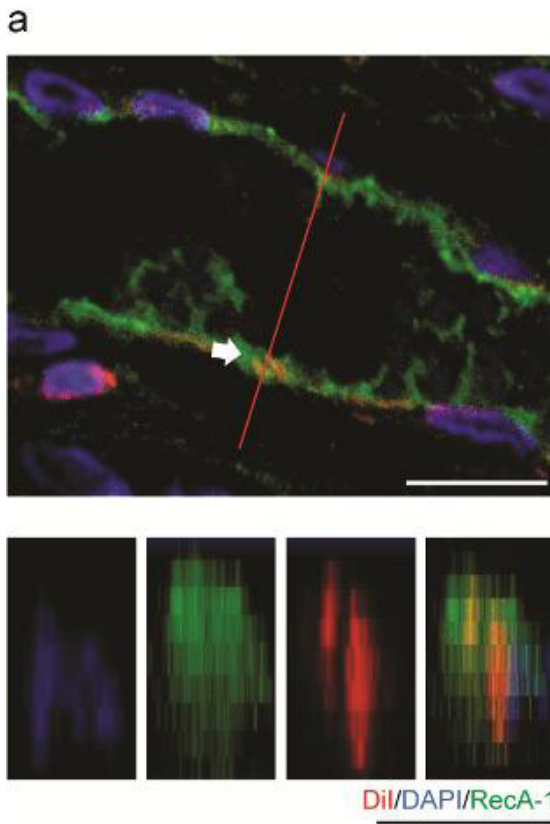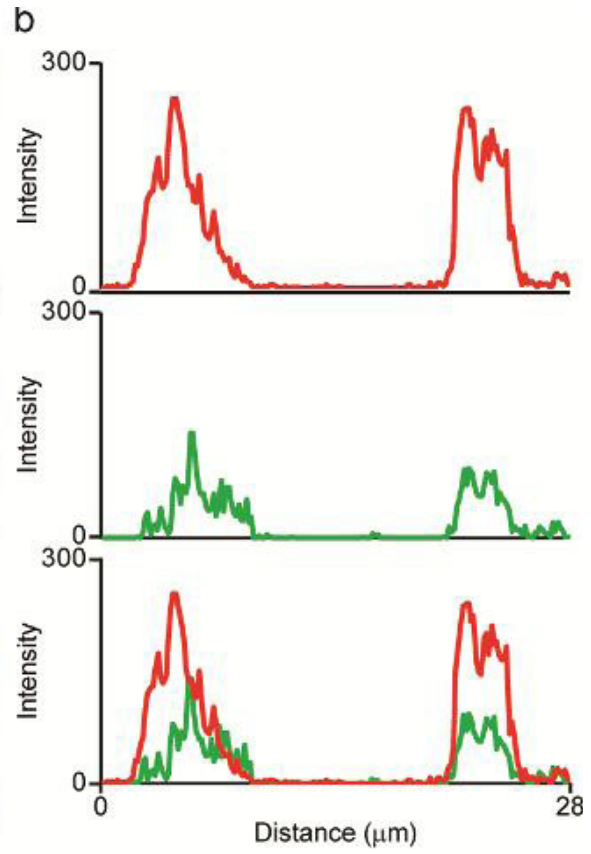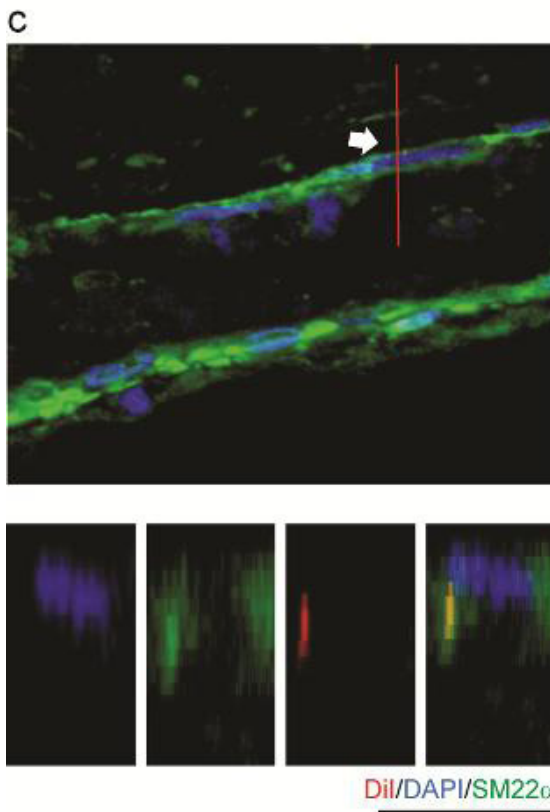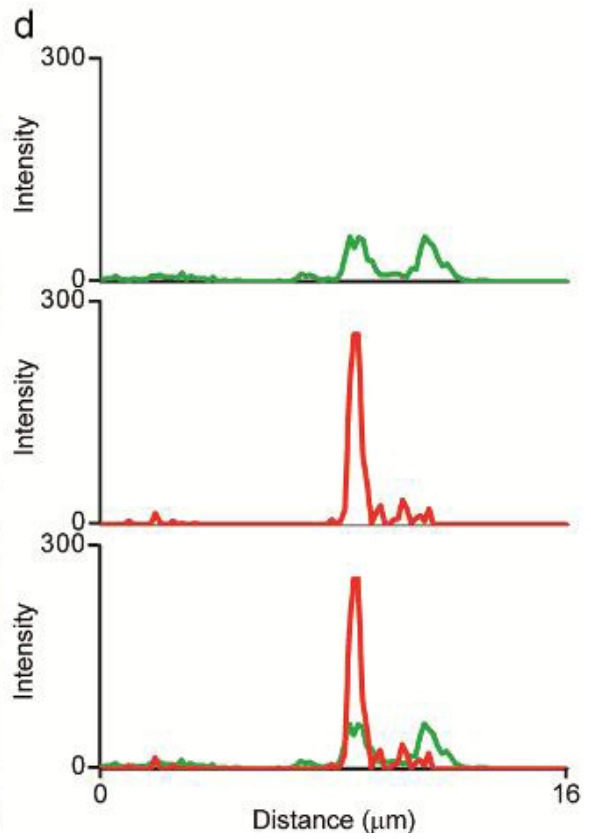

**Figure S8: DiI-positive MNCs are integrated into vascular structure.** (a) DiI (red) and RECA-1 (green) double positive endothelial cells (arrow) are indicated. The merged panel shows the locus (arrow) at which images were obtained for the x-z projection. Nuclei were stained with DAPI (blue). The scale bar is 20  $\mu\text{m}$ . (b) Fluorescence intensities are determined along the red line and shown in merged plot. (c) DiI (red) and SM22- $\alpha$  (green) double positive smooth muscle cells (arrow) are indicated. The merged panel shows the locus (arrow) at which images were obtained for the x-z projection. Nuclei were stained with DAPI (blue). The scale bar is 20  $\mu\text{m}$ . (d)
