# Supplementary material
Source: PubMed Central journal article supplement (PMC3589169)
Supplement: mt2012268x9.pdf [file mt2012268x9.pdf]

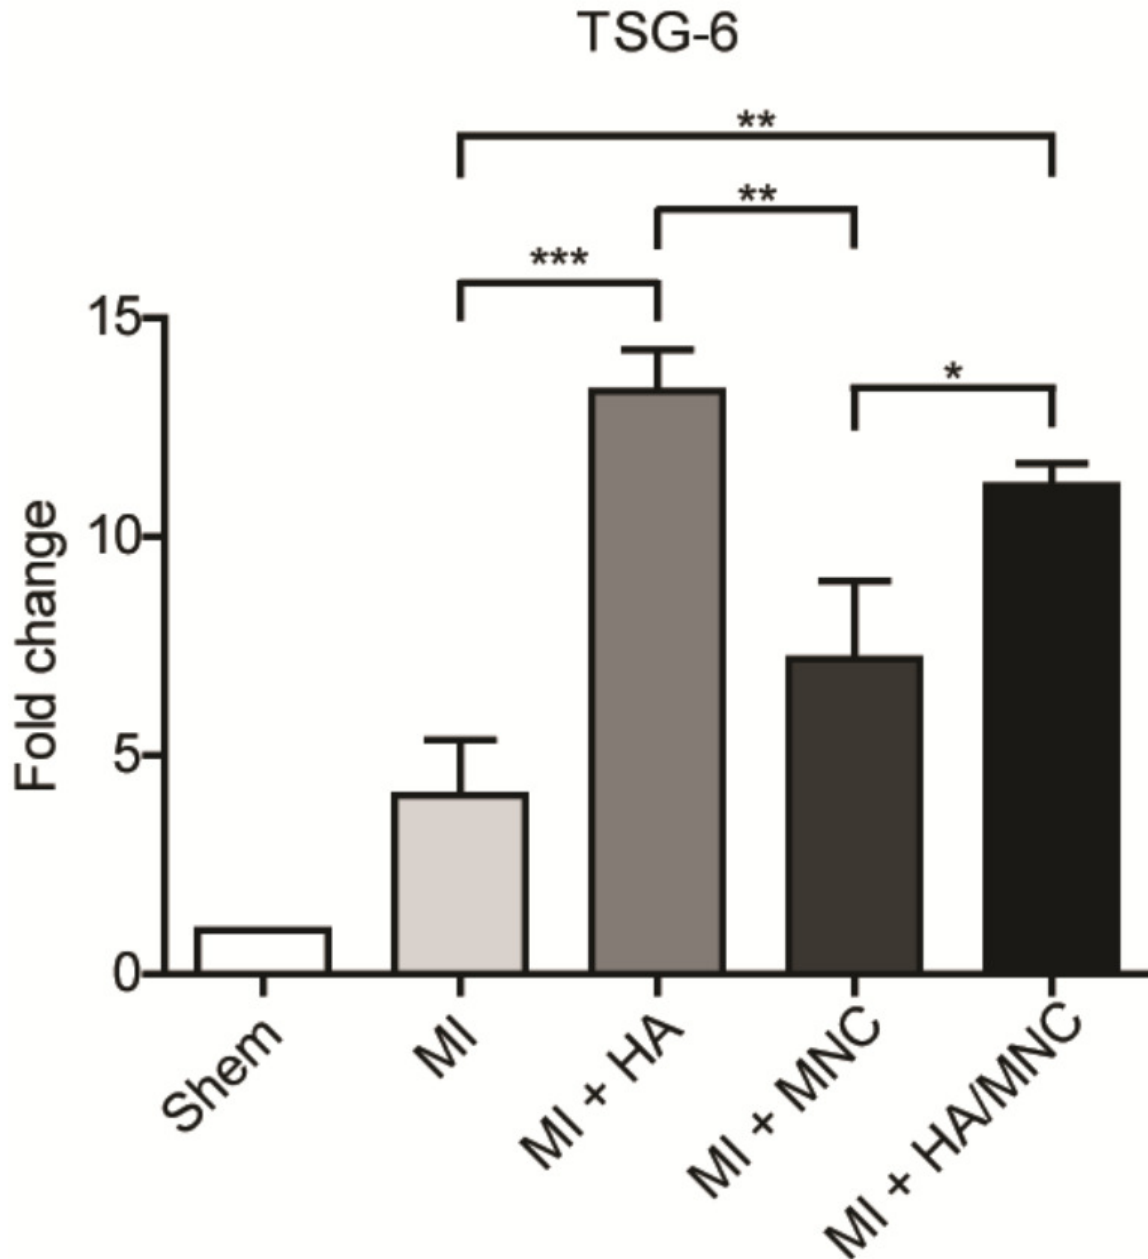

**Figure S9: Injection HA or HA/MNC induces TSG-6 gene expression post-MI.** Shown is real-time RT-PCR for gene expression of TSG-6 using RNA isolated from different treatment groups 3 days post-MI. Data are presented as mean SEM. \*  $P < 0.05$ , \*\*  $P < 0.01$ , \*\*\* $P < 0.001$ .  $n = 6$  per group.
