# Supplementary material
Source: PubMed Central journal article supplement (PMC3589169)
Supplement: mt2012268x10.pdf [file mt2012268x10.pdf]

**Table S1:** List of primers for real-time RT-PCR Gene name

|               | Forward 5'-3'                | Reverse 3'-5'               |
|---------------|------------------------------|-----------------------------|
| FGF-2         | CAGTTCGTGTGTGGACC<br>AAG     | TCAGCGGAGCACAGTAC<br>ATC    |
| HGF           | CGAGCTATCGCGGTAAA<br>GAC     | TGTAGCTTTCACCGTTG<br>CAG    |
| IGF-1         | CAGTTCGTGTGTGGACC<br>AAG     | TCAGCGGAGCACAGTAC<br>ATC    |
| PDGF-b        | CTGCCTCTCTGCTGCTA<br>CCT     | GATGAGCTTTCGACTC<br>GAC     |
| SDF-1         | GCTCTGCATCAGTGACG<br>GTA     | TAATTTCCGGTCAATGC<br>ACA    |
| Sox9          | CCGGCCACCCACGGCC<br>AGGT     | GCGGAGGCGCCTGTGG<br>GGCT    |
| RUNX2         | GCACCAGCCGGCGCTT<br>CAGCC    | TGCGGCCGCCTCCTGCT<br>GCT    |
| DDR2          | ACCGGATCCAGGGCCG<br>GGCA     | CGCTTCCGCTGCCCGG<br>AGACCC  |
| Acta2         | CGCTTCCGCTGCCCGG<br>AGACCC   | TGGTGCTGGGAGCGAG<br>GGCTGT  |
| CD68          | ACCACCGGAAGCACAG<br>CAAGCCCT | GGGCGGAGGTGGTCCA<br>GGGTGA  |
| CD163         | TGCCGGCGTGGTGTGC<br>AGGG     | AGTGGGGGCGCCACCG<br>AGCA    |
| Tnl           | GCCGGCGCCTGCTCCT<br>GTCC     | CGCGGCCCTTCTCTCCA<br>CGTCGC |
| Nkx2.5        | AGCTGGGCCCCGCGCC<br>TTCG     | CGCCGCCGTGGTCGTC<br>GCCT    |
| $\alpha$ -MHC | GCGCAGCCGCAACGAG<br>GCCC     | TGCGCCGCTCCACGATG<br>GCG A  |
| TSG-6         | AAGCAGCCAGAAAGATT<br>GGA     | TTCGGGTTGTAGCAATA<br>GGC    |
